# Supplementary material for: Role of the Appendicular Skeletal Muscle Index for Predicting the Recurrence-Free Survival of Head and Neck Cancer
Source: PubMed Central journal article supplement (PMC7918727; doi:10.3390/diagnostics11020309), 2021-02-14
Supplement: diagnostics-11-00309-s001.pdf [file diagnostics-11-00309-s001.pdf]

Supplementary Table S1. Lean muscle changes in the high ASMI group of patients with LAHNC

|            | <b>Pre-CCRT</b> | <b>Post-CCRT</b> | <b>Percent change</b> | <b>P value</b> |
|------------|-----------------|------------------|-----------------------|----------------|
|            | <b>(n=69)</b>   | <b>(n=69)</b>    | <b>(95% CI)</b>       |                |
| Trunk (kg) | 22.5±2.4        | 21.4±2.4         | -4.6% (-6.0, -3.2)    | <.001*         |
| Waist (kg) | 3.3±0.5         | 3.1±0.4          | -6.0% (-8.0, -4.1)    | <.001*         |
| Hips (kg)  | 6.8±0.9         | 6.1±0.8          | -9.2% (-10.8, -7.6)   | <.001*         |
| ASM (kg)   | 20.4±2.9        | 18.5±2.8         | -9.2% (-10.8, -7.6)   | <.001*         |
| Arms (kg)  | 5.7±0.9         | 5.1±0.8          | -10.4% (-12.0, -8.7)  | <.001*         |
| Legs (kg)  | 14.6±2.1        | 13.3±2.0         | -9.0% (-10.8, -7.2)   | <.001*         |

Abbreviations: ASMI, appendicular skeletal muscle index; LAHNC, locally advanced head and neck cancer; CCRT, concurrent chemoradiotherapy; CI, confidence interval; ASM, appendicular skeletal muscle

Supplementary Table S2. Lean muscle changes in the low ASMI group of patients with LAHNC

|            | <b>Pre-CCRT</b> | <b>Post-CCRT</b> | <b>Percent change</b> | <b>P value</b> |
|------------|-----------------|------------------|-----------------------|----------------|
|            | <b>(n=29)</b>   | <b>(n=29)</b>    | <b>(95% CI)</b>       |                |
| Trunk (kg) | 19.8±1.8        | 19.6±2.3         | -1.2% (-4.1, 1.7)     | .403           |
| Waist (kg) | 2.9±0.3         | 2.9±0.4          | -1.4% (-5.0, 2.2)     | .435           |
| Hips (kg)  | 5.1±0.6         | 5.0±0.7          | -2.3% (-5.8, 1.2)     | .158           |
| ASM (kg)   | 15.0±1.7        | 14.3±2.3         | -4.2% (-8.4, -0.1)    | .049*          |
| Arms (kg)  | 4.3±0.6         | 3.9±0.9          | -7.4% (-14.6, -0.1)   | .057           |
| Legs (kg)  | 10.6±1.4        | 10.3±1.8         | -2.7% (-6.9, 1.5)     | .195           |

Abbreviations: ASMI, appendicular skeletal muscle index; LAHNC, locally advanced head and neck cancer; CCRT, concurrent chemoradiotherapy; CI, confidence interval; ASM, appendicular skeletal muscle
